# Supplementary material
Source: PubMed Central journal article supplement (PMC7871328)
Supplement: jf0c06052_si_001.pdf [file jf0c06052_si_001.pdf]

*Supporting information*

# Preparation of boronic acid-functionalized cryogels using modular and clickable building blocks for bacteria separation

Hongwei Zheng,<sup>a,b</sup> Solmaz Hajizadeh,<sup>a</sup> Haiyue Gong,<sup>a</sup> Hong Lin,<sup>b</sup> Lei Ye<sup>\*a</sup>

<sup>a</sup> *Division of Pure and Applied Biochemistry, Department of Chemistry, Lund University, Box 124, 221 00 Lund, Sweden*

<sup>b</sup> *Food Safety Laboratory, College of Food Science & Engineering, Ocean University of China, Qingdao 266003, China*

**\*Corresponding author:** Lei Ye, E-mail address: lei.ye@tbiokem.lth.se

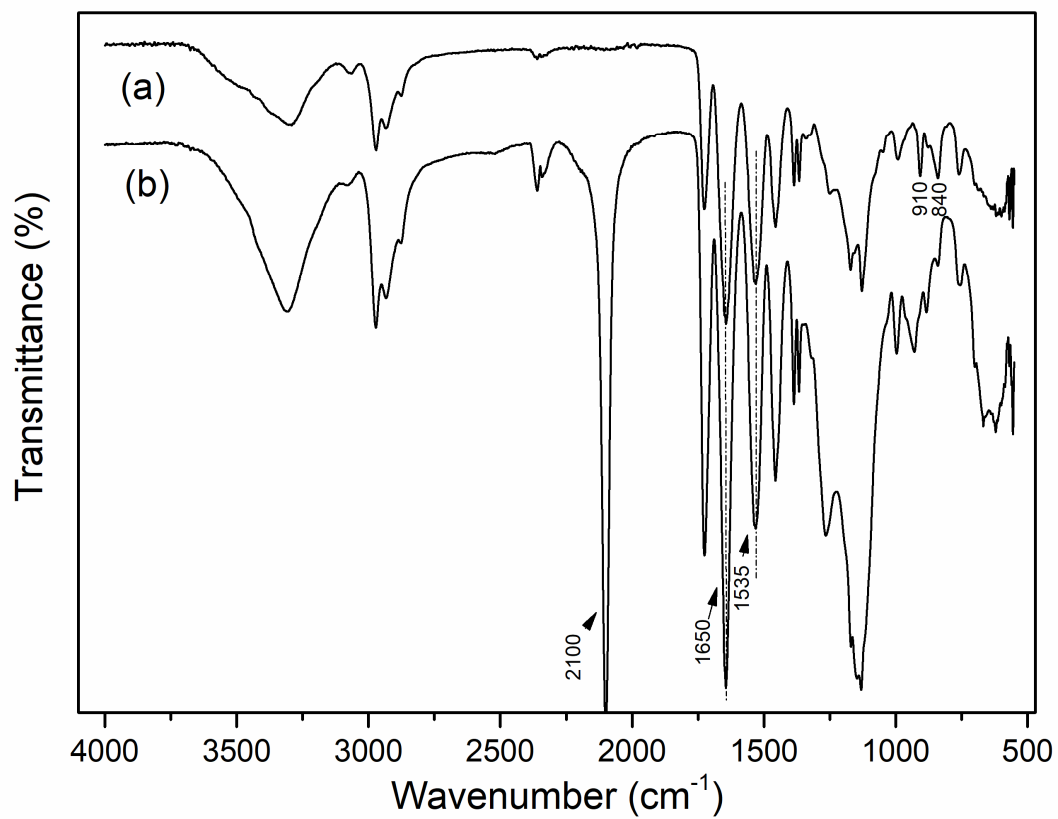

**Figure S1.** FT IR spectra of (a) poly(NIPAm-co-GMA) and (b) poly(NIPAm-co-GMA)@N<sub>3</sub>.

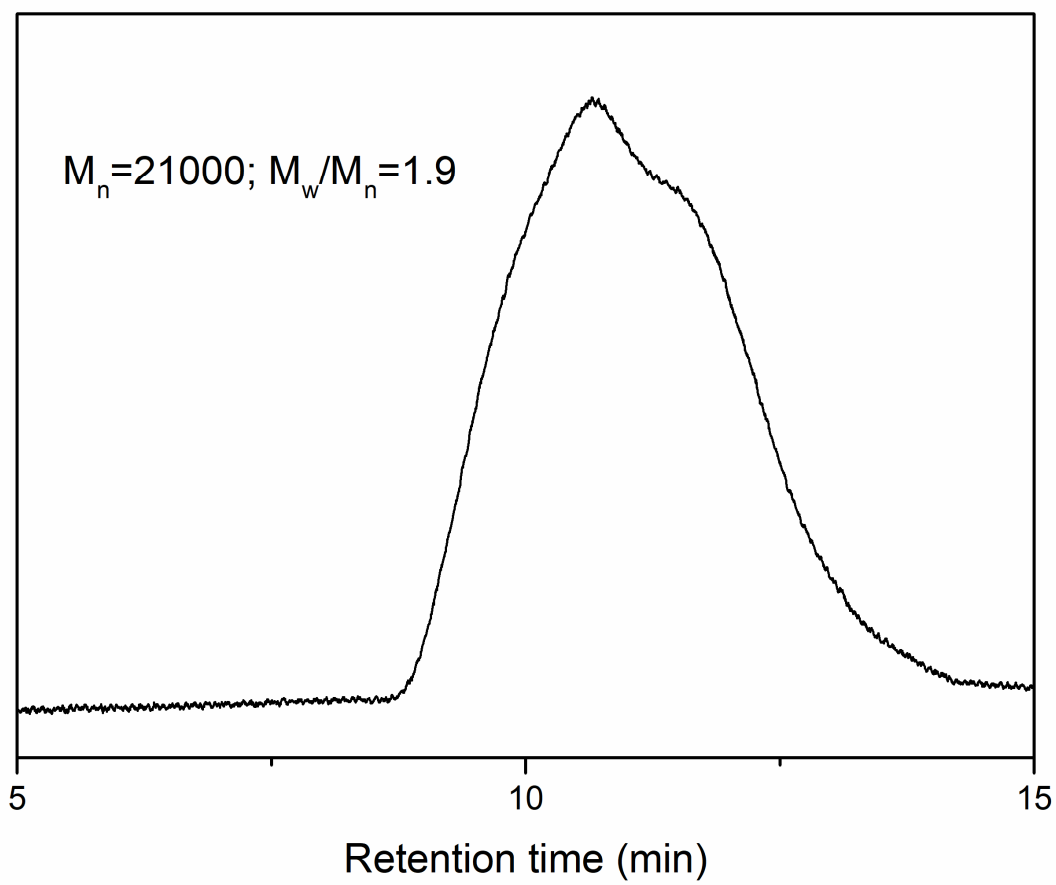

**Figure S2.** GPC trace of poly(NIPAm-co-GMA)@N<sub>3</sub>.

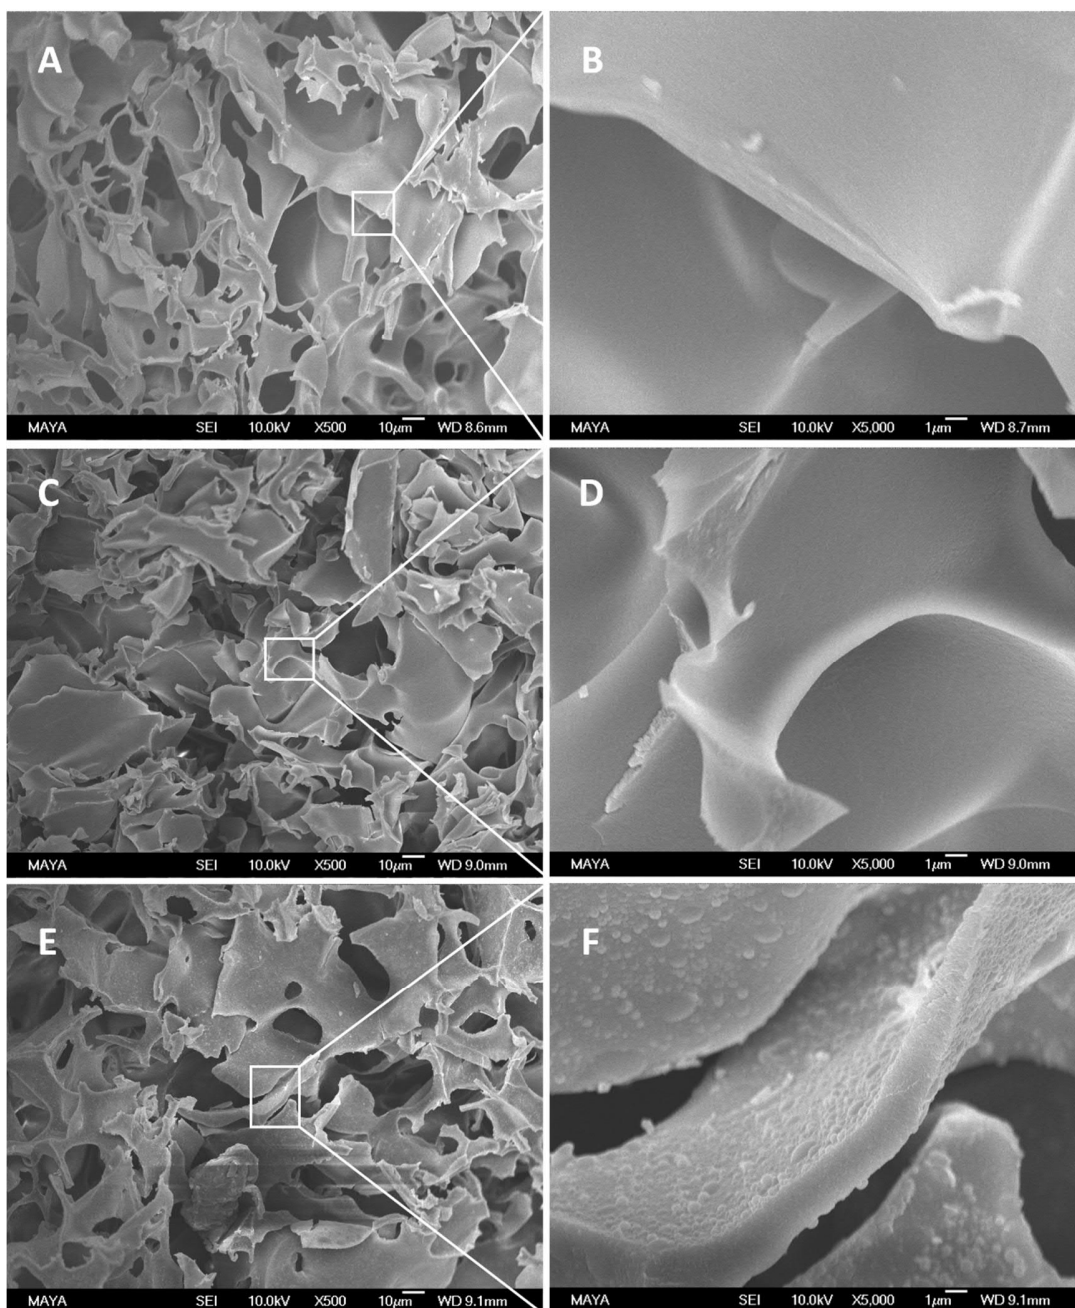

**Figure S3.** SEM images of AG-N<sub>3</sub> cryogel (A, B), AG-alkyne cryogel (C, D), AG-alkyne@polymer-N<sub>3</sub> cryogel (E, F). The scale bars are 10 μm in (A), (C), (E), and 1 μm in (B), (D), (F).

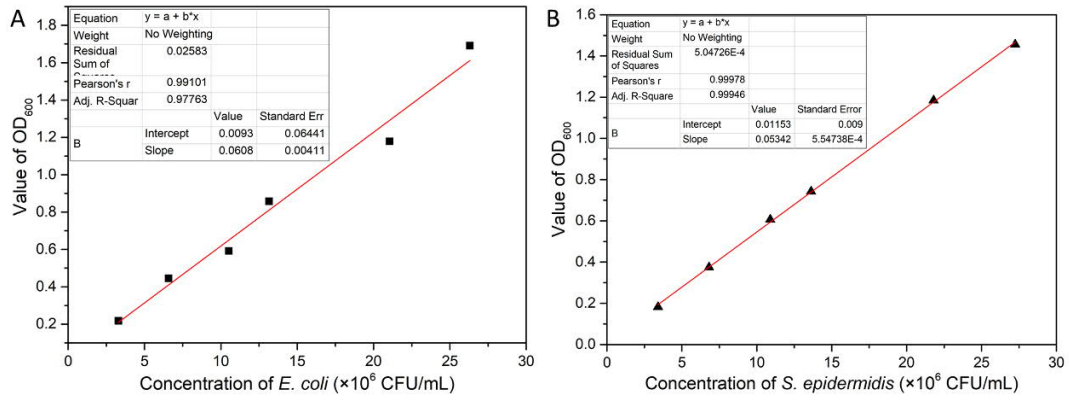

**Figure S4.** Calibration plots for quantification of (A) *E. coli* and (B) *S. epidermidis*.

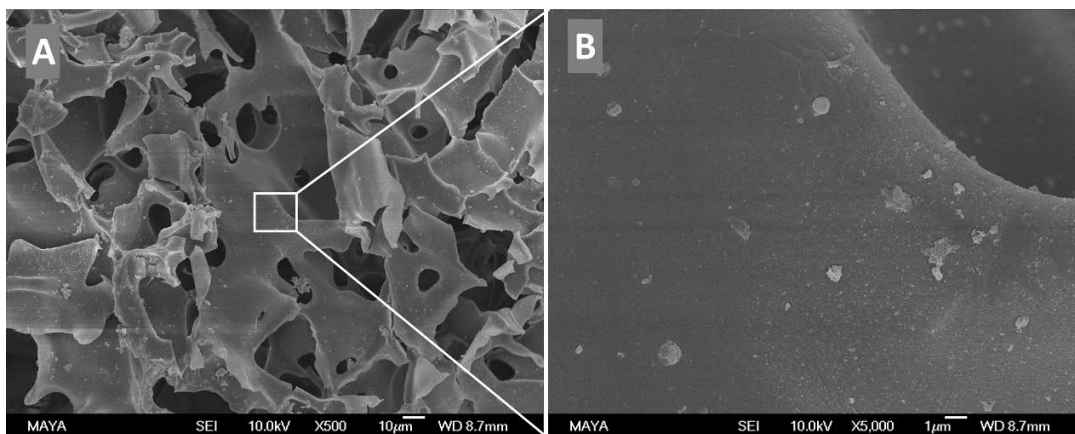

**Figure S5.** SEM images of AG-alkyne@polymer-pBA cryogel loaded with *S. epidermidis*, after elution using 0.5 M fructose (in 20 mM PBS, pH 9.0, containing 0.5 M NaCl). The scale bars are 10  $\mu\text{m}$  in (A) and 1  $\mu\text{m}$  in (B).

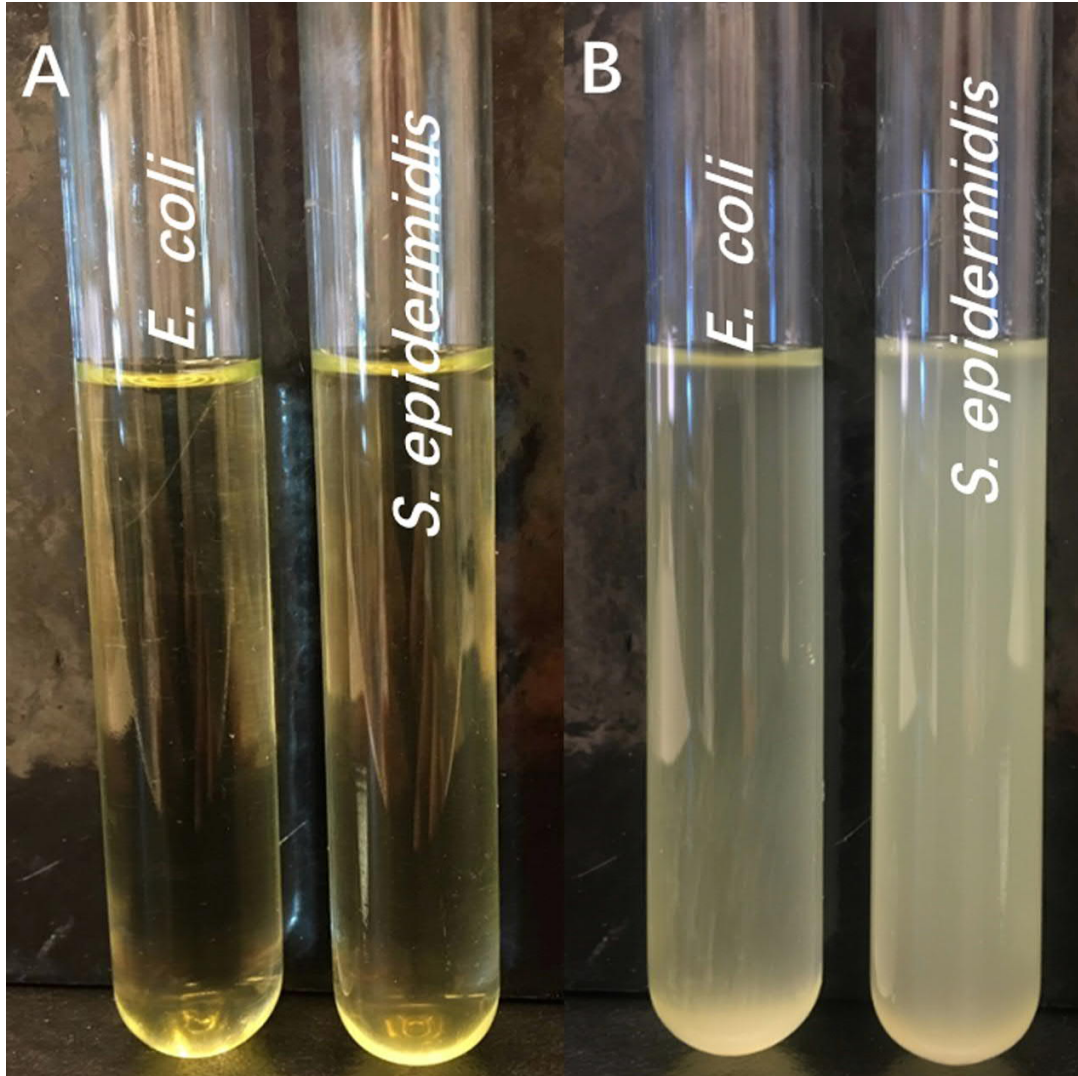

**Figure S6.** Eluted *E. coli* and *S. epidermidis* before (A) and after (B) cultivation in LB medium at 37 °C for 16 h. The bacteria suspension (0.5 mL) eluted by 0.5 M fructose-PBS buffer was transferred into 8 mL of fresh LB medium for cultivation.

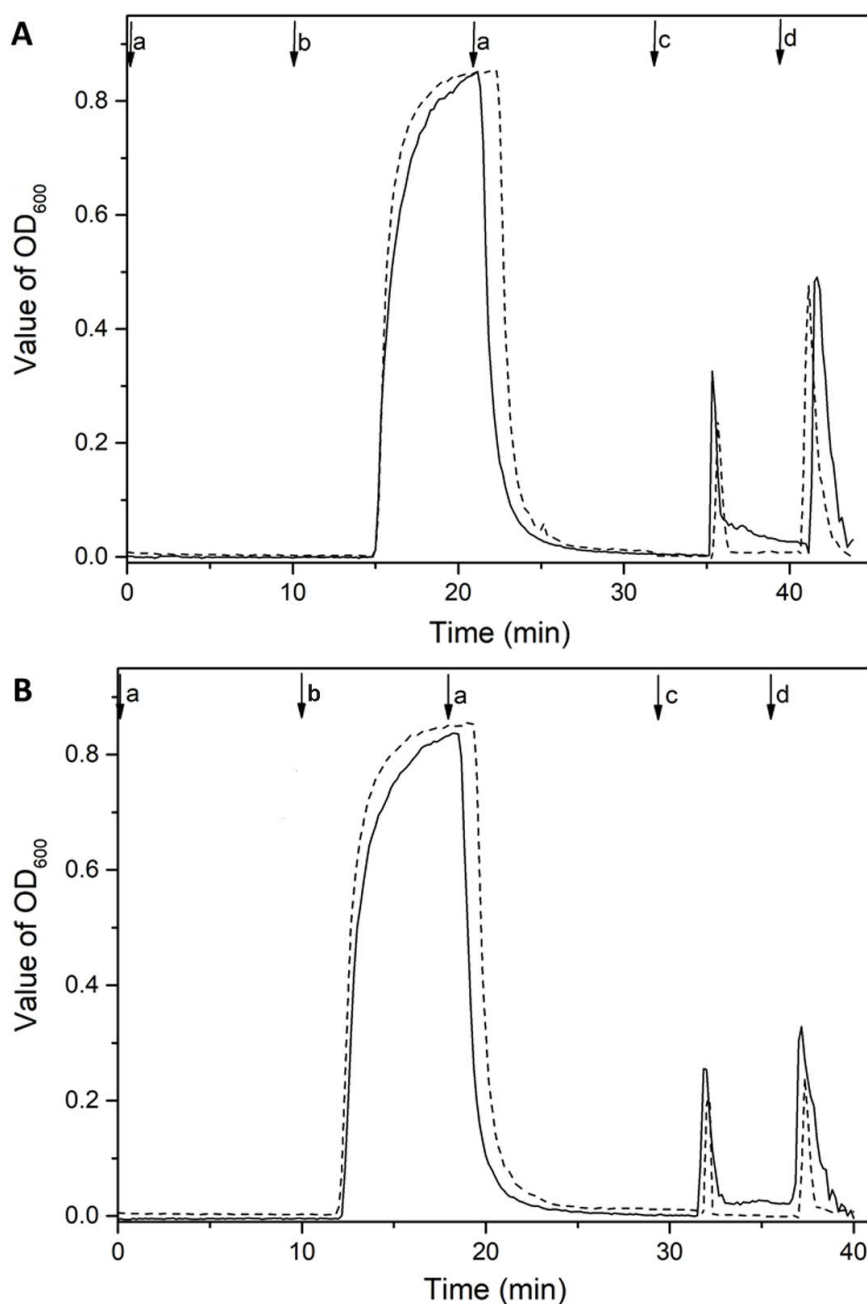

**Figure S7.** Chromatograms of bacteria separation tested with (A) *E. coli* and (B) *S. epidermidis* on different cryogels: (—) AG-alkyne@polymer-pBA, (---) AG-BA. The arrows indicate: (a) loading of 10 mM PBS (pH 8.0), (b) loading of *E. coli* or *S. epidermidis* suspensions ( $OD_{600} \approx 1$ ) in 10 mM PBS (pH 8.0), (c) elution with 0.5 M fructose in 20 mM phosphate buffer (pH 9.0, containing 0.5 M NaCl), (d) washing with 100 mM HAC.



**Table S1.** Physical properties of AG and AG-alkyne@polymer-pBA cryogel

| Temperature | Cryogel samples                   | Swelling Degree<br>(g H <sub>2</sub> O/g Cryogel) | Macroporosity<br>(Volume %) |
|-------------|-----------------------------------|---------------------------------------------------|-----------------------------|
| 25°C        | AG cryogel                        | 15.13 ± 0.07                                      | 72.42 ± 0.01                |
|             | AG-alkyne@polymer-<br>pBA cryogel | 13.38 ± 0.06                                      | 69.05 ± 0.01                |
| 40°C        | AG cryogel                        | 14.84 ± 0.06                                      | -                           |
|             | AG-alkyne@polymer-<br>pBA cryogel | 11.95 ± 0.11                                      | -                           |

**Table S2.** Comparison of binding capacities of different adsorbents towards bacteria

| Adsorbent                                             | Ligands             | Targets                                     | Sample                      | Binding Capacity                                                                                                               | Ref.      |
|-------------------------------------------------------|---------------------|---------------------------------------------|-----------------------------|--------------------------------------------------------------------------------------------------------------------------------|-----------|
| AG@epoxy@PEI-DFFPBA                                   | boronic acid        | <i>Salmonella</i> spp.,<br><i>S. aureus</i> | 25% cow milk;<br>water      | <i>Salmonella</i> spp.: $(906.60 \pm 15.73) \times 10^7$<br>CFU/g<br><i>S. aureus</i> : $(582.59 \pm 13.19) \times 10^7$ CFU/g | [1]       |
| N-methylimidazolium functionalized magnetic particles | N-methylimidazolium | <i>Listeria monocytogenes</i>               | mineral water and tap water | $6.22 \times 10^8$ CFU/mg                                                                                                      | [2]       |
| AGe-Si@brush-pBA                                      | boronic acid        | yeast cell                                  | -                           | 6 mg/g                                                                                                                         | [3]       |
| PDA@Fe <sub>3</sub> O <sub>4</sub> nanoparticles      | ion-exchange        | <i>S. aureus</i>                            | tap water                   | $1.2 \times 10^8$ CFU/mg                                                                                                       | [4]       |
| Si@poly(NIPAm-co-GMA)@PCAPBA                          | boronic acid        | <i>E. coli</i> ,<br><i>S. epidermids</i>    | water, 25% milk             | <i>E. coli</i> : $13.4 \times 10^7$ CFU/mg<br><i>S. epidermids</i> : $3.36 \times 10^9$ CFU/g                                  | [5]       |
| Vancomycin modified PEGylated-magnetic nanoparticles  | vancomycin          | <i>Listeria monocytogenes</i>               | lettuce                     | $\sim 2.4 \times 10^7$ CFU/mg                                                                                                  | [6]       |
| AG-alkyne@polymer-pBA cryogel                         | boronic acid        | <i>E. coli</i> ,<br><i>S. epidermids</i>    | water, 25% milk             | <i>E. coli</i> : $2.15 \times 10^9$ CFU/g<br><i>S. epidermids</i> : $3.36 \times 10^9$ CFU/g                                   | This work |

**Table S3.** Comparison of different composite cryogel for chromatographic separation

| <b>Cryogels</b>                         | <b>Ligands</b>                | <b>Targets</b>                            | <b>Advantages / Disadvantages</b>                                                     | <b>Ref.</b> |
|-----------------------------------------|-------------------------------|-------------------------------------------|---------------------------------------------------------------------------------------|-------------|
| Organic-inorganic cryogel composite     | boronic acid                  | nucleosides                               | Synthesis under mild conditions; high surface area; simple synthesis conditions       | [7]         |
| Tyrosine-imprinted cryogel              | molecularly imprinted polymer | tyrosine                                  | High selectivity and good reusability                                                 | [8]         |
| Poly(Hydroxyethyl Methacrylate) cryogel | antibody                      | human immunoglobulin M                    | High specificity and biocompatibility. High-cost                                      | [9]         |
| PolyAdenine                             | adenine methacrylate          | RNA                                       | Sing-step synthesis; high RNA binding capacities; simple operation procedures         | [10]        |
| AGe-Si@brush-pBA                        | boronic acid                  | yeast cell; haemoglobin                   | High surface area and multiple affinity ligands. Complicated synthesis procedures     | [3]         |
| poly(HEMA- <i>co</i> -MAAc) cryogel     | ion-exchange                  | cisplatin                                 | High hydrophilicity and binding capacities. Selectivity limited                       | [11]        |
| AG-alkyne@polymer-pBA cryogel           | boronic acid                  | <i>E. coli</i> ,<br><i>S. epidermidis</i> | High ligand density, high binding capacity for bacteria, simple and modular synthesis | This work   |

## **Reference**

- [1] Zheng, H.; Han, F.; Lin, H.; Cao, L.; Pavase, T.; Sui, J. Preparation of a novel polyethyleneimine functionalized sepharose-boronate affinity material and its application in selective enrichment of food borne pathogenic bacteria. *Food Chem.* **2019**, *294*, 468-476.
- [2] Wang, Y.; Deng, M.; Jia, L. N-methylimidazolium functionalized magnetic particles as adsorbents for rapid and efficient capture of bacteria. *Microchim Acta* **2014**, *181*, 1275-1283.
- [3] Hajizadeh, S.; Ye, L. Hierarchical macroporous material with dual responsive copolymer brushes and phenylboronic acid ligands for bioseparation of proteins and living cells. *Sep. Purif. Technol.* **2019**, *224*, 95-105.
- [4] Gao, X.; Yao, X.; Zhong, Z.; Jia, L. Rapid and sensitive detection of *Staphylococcus aureus* assisted by polydopamine modified magnetic nanoparticles. *Talanta*, **2018**, *186*, 147-153.
- [5] Zheng, H.; Gong, H.; Cao, L.; Lin, H.; Ye, L. Photoconjugation of Temperature-and pH-Responsive Polymer with Silica Nanoparticles for Separation and Enrichment of Bacteria. *Colloid. Surface. B* **2020**, 111433.
- [6] Meng, X.; Li, F.; Li, F.; Xiong, Y.; Xu, H. Vancomycin modified PEGylated-magnetic nanoparticles combined with PCR for efficient enrichment and detection of *Listeria monocytogenes*. *Sensor. Actuat. B-Chem.* **2017**, *247*, 546-555.
- [7] Zhao, S.; Zou, Y.; Wang, Y.; Zhang, H.; Liu, X. Organized cryogel composites with 3D hierarchical porosity as an extraction adsorbent for nucleosides. *J. Sep. Sci.* **2019**, *42*, 2140-2147.

- [8] Bakhshpour, M.; Göktürk, I.; Bereli, N.; Denizli, A. Molecularly imprinted cryogel cartridges for the selective recognition of tyrosine. *Biotechnol. Progr.* **2020**, *36*, e3006.
- [9] Bakhshpour, M.; Topcu, A.; Bereli, N.; Alkan, H.; Denizli, A. Poly(Hydroxyethyl Methacrylate) Immunoaffinity Cryogel Column for the Purification of Human Immunoglobulin M. *Gels*, **2020**, *6*, 4.
- [10] Köse, K.; Erol, K.; Özgür, E.; Uzun, L.; Denizli, A. PolyAdenine cryogels for fast and effective RNA purification. *Colloid. Surface. B* **2016**, *146*, 678-686.
- [11] Farías, T.; Hajizadeh, S.; Ye, L. Cryogels with high cisplatin adsorption capacity: Towards removal of cytotoxic drugs from wastewater. *Sep. Purif. Technol.* **2020**, *235*, 116203.
